# Supplementary material for: Studies on the substrate-dependent photocatalytic properties of Cu2O heterojunctions
Source: Royal Society of Chemistry journal article supplement (doi:10.1039/d0ra10681j), 2021-01-01
Supplement: d0ra10681j1.pdf [file d0ra10681j1.pdf]

## Supplementary Information

### Studies on the substrate-dependent photocatalytic properties of Cu<sub>2</sub>O heterojunctions

Riza Ariyani Nur Khasanah,<sup>a</sup> Hui-Ching Lin,<sup>a</sup> Hsiang-Yun Ho,<sup>b</sup> Yen-Ping Peng,<sup>c</sup> Tsong-Shin Lim,<sup>a</sup>  
Hsi-Lien Hsiao,<sup>a</sup> Chang-Ren Wang,<sup>a</sup> Min-Chieh Chuang,<sup>c</sup> and Forest Shih-Sen Chien<sup>\*,a</sup>

<sup>a</sup> Department of Applied Physics, Tunghai University, Taichung 407224, Taiwan

<sup>b</sup> Department of Environmental Science and Engineering, Tunghai University, Taichung 407224,  
Taiwan

<sup>c</sup> Institute of Environmental Engineering, National Sun Yat-sen University, Kaoshiung 804,  
Taiwan

<sup>d</sup> Department of Chemistry, Tunghai University, Taichung 407224, Taiwan

\*E-mail address: fsschien@thu.edu.tw

#### 1. Preparation method of TNA/Ti, Cu<sub>2</sub>O/TNA/Ti, Cu<sub>2</sub>O/Ti, and Cu<sub>2</sub>O/FTO

TiO<sub>2</sub> nanotube arrays (TNA) /Ti and Cu<sub>2</sub>O on different substrates, i.e. TNA/Ti, Ti, and fluorine-doped tin oxide (FTO), were prepared according to Chang et al. [1]. A source meter (Keithley 2400) was used to fabricate TNA through the electrochemical anodization of Ti plate.

Before the fabrication, the Ti plate was cleaned by acetone, ethanol, and deionized water in an ultrasonic cleaner. A mixed solution of ethylene glycol (99.8%, Sigma-Aldrich), 0.25 wt % NH<sub>4</sub>F (98.0%, Sigma-Aldrich) and 2 vol% H<sub>2</sub>O was used as an etching solution. The anodization was done using two electrodes (Ti plate served as a working electrode and Pt wire served as a counter electrode) under the voltage of 40 V DC for 1 h. Then, TNA was calcined in a tubular furnace for 3 h at 450°C with a temperature increase of 2°C/min.

Cu<sub>2</sub>O was electrodeposited on the different substrates, which were TNA/Ti, Ti, and FTO, by the square wave voltammetry electrochemical (SWVE) deposition method. A potentiostat (Metrohm-Autolab B.V. PGSTAT204) was used in the preparation of Cu<sub>2</sub>O under three electrodes, where TNA/Ti, Ti, and FTO served as a working electrode, Pt plate served as a counter electrode, and Ag/AgCl served as a reference electrode. A mixed solution of Cu(CH<sub>3</sub>-COO)<sub>2</sub>·H<sub>2</sub>O 0.02 M (99.9%, Sigma-Aldrich) and NaCH<sub>3</sub>COO 0.1 M (99%, Sigma-Aldrich) whose pH value was adjusted to 5.7 via CH<sub>3</sub>COOH 0.5 M (99.8%, Sigma-Aldrich) was used as an electrolyte. Before the deposition process, the substrate was immersed in the solution for 30 minutes. The SWVE deposition was started in the applied voltage of -1 V to 0 V, with an amplitude of 5 mV and a frequency of 5 Hz. The formation of Cu<sub>2</sub>O follows the equation (1).

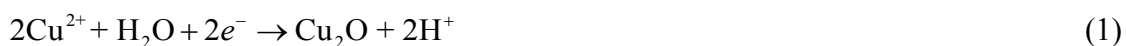

## 2. Morphology and XRD pattern of commercial Cu<sub>2</sub>O

The morphology of commercial Cu<sub>2</sub>O was captured in the form of powder, shown in Fig. S1 (a). The commercial Cu<sub>2</sub>O exhibited non-uniform size with the average particle size of approximately 5.2 μm. The X-ray diffraction (XRD) pattern in Fig. S1 (b) indicates 2θ values of 29.54°, 32.26°, 42.26°, 52.42°, 61.30°, 73.46°, and 77.30°, indexed to (110), (111), (200), (211),

(220), (311), and (222), respectively, representing  $\text{Cu}_2\text{O}$  crystalline phase (ICSD file no. 98-006-0719).

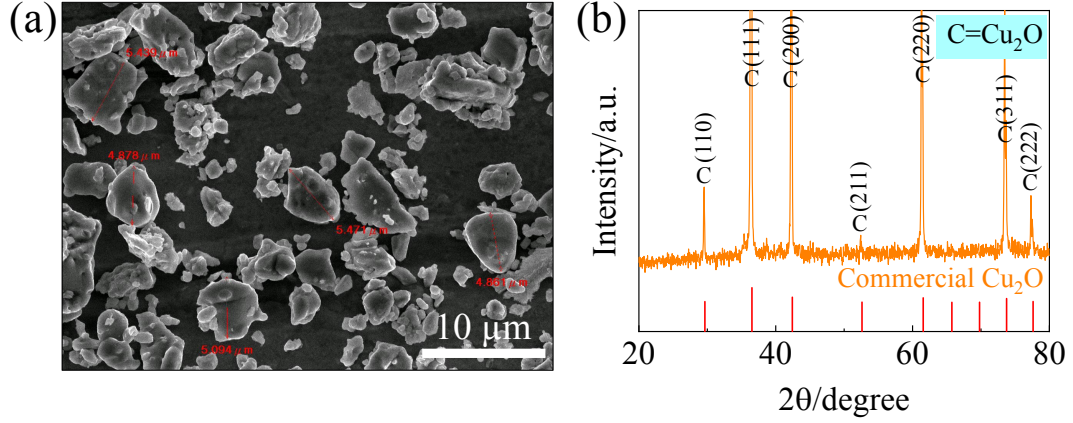

**Fig. S1.** (a) Morphology and (b) XRD pattern of commercial  $\text{Cu}_2\text{O}$ . The red sticks in (b) are the phases of  $\text{Cu}_2\text{O}$  taken from ICSD file no. 98-006-0719.

### 3. Optical absorption of $\text{Cu}_2\text{O}/\text{FTO}$

The optical absorption ( $A$ ) spectra of  $\text{Cu}_2\text{O}/\text{FTO}$  was obtained from the optical reflection ( $R$ ) and transmission ( $T$ ) spectra according to the equation of  $A(\%) = 100\% - R(\%) - T(\%)$ , shown in Fig. S2. The bandgap of  $\text{Cu}_2\text{O}/\text{FTO}$  was approximately 2.47 eV (500 nm).

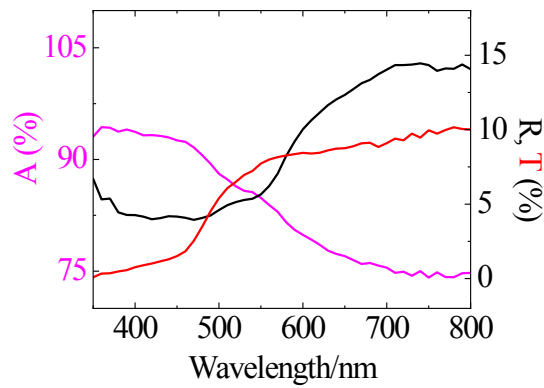

**Fig. S2.** Optical reflection, transmission, and absorption spectra of  $\text{Cu}_2\text{O}/\text{FTO}$ .

#### 4. Optical absorption of Commercial $\text{Cu}_2\text{O}$

The optical transmission and reflection spectra of the commercial  $\text{Cu}_2\text{O}$  powder was measured on glass substrate, shown in Fig. S3. The optical absorption spectra shows that the commercial  $\text{Cu}_2\text{O}$  has a high absorption in the visible light with the bandgap of about 2.06 eV (600 nm).

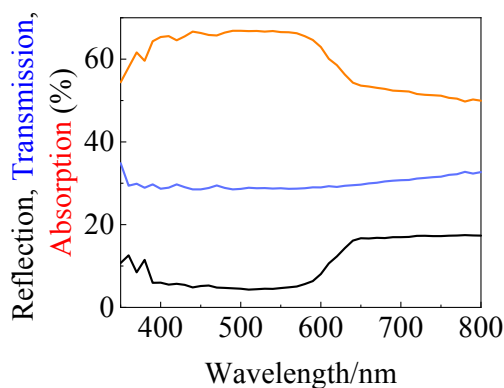

**Fig. S3.** Optical reflection, transmission, and absorption of commercial  $\text{Cu}_2\text{O}$ .

#### 5. Photocurrent density under different monochromatic wavelength

The photocurrent density under different chopped monochromatic wavelengths with the identical light intensity of  $5 \text{ mW/cm}^2$  without applied bias is shown in Fig. S4. TNA/Ti and  $\text{Cu}_2\text{O/TNA/Ti}$  performed the positive photocurrent density, representing the photoanodic behavior, whereas  $\text{Cu}_2\text{O/Ti}$  and  $\text{Cu}_2\text{O/FTO}$  performed the negative photocurrent density, representing the photocathodic behavior. TNA/Ti only demonstrated the high photoresponse in UV range. On the other hand,  $\text{Cu}_2\text{O/TNA/Ti}$ ,  $\text{Cu}_2\text{O/Ti}$ , and  $\text{Cu}_2\text{O/FTO}$  responded to UV–visible light because of the narrow bandgap of  $\text{Cu}_2\text{O}$  (2.47 eV). This photocurrent density was then normalized against the light intensity and plotted to show spectral responses, as shown in Fig. 3.

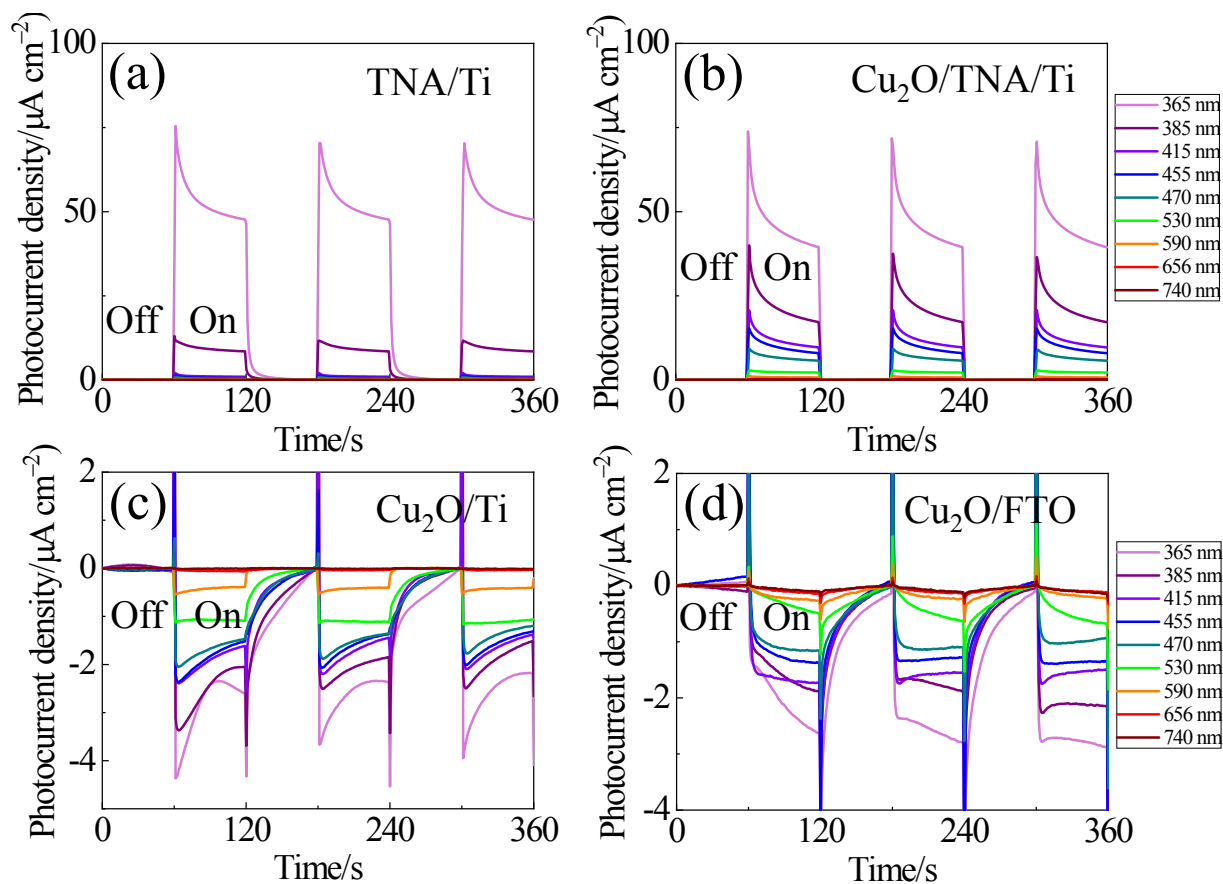

**Figure S4.** Photocurrent density of (a) TNA/Ti, (b) Cu<sub>2</sub>O/TNA/Ti, (c) Cu<sub>2</sub>O/Ti, and (d) Cu<sub>2</sub>O/FTO under different chopped monochromatic wavelengths (5 mW/cm<sup>2</sup>), measured in Na<sub>2</sub>SO<sub>4</sub> 0.05 M without applied bias.

## References

1. K.-L. Chang, Q. Sun, Y.-P. Peng, S.-W. Lai, M. Sung, C.-Y. Huang, H.-W. Kuo, J. Sun and Y.-C. Lin, *Chemosphere*, 2016, **150**, 605–614.
